# Supplementary material for: Metal–organic framework-supported ionic liquids for lipase immobilization: design, characterization, and investigation of catalytic performance
Source: Royal Society of Chemistry journal article supplement (doi:10.1039/d3re00067b), 2023-01-01
Supplement: d3re00067b1.pdf [file d3re00067b1.pdf]

## Electronic Supplementary Information

### **Metal-organic frameworks supported ionic liquids for lipase immobilization: design, characterization and investigation of catalytic performance**

Hongbo Suo, Qi Qi, Xusheng Dai, Xinyue Geng, Qi Li, Jie Yang, Guoyun Liu\*, Renmin Liu\*, Lili Xu\*

(School of Pharmaceutical Sciences, Liaocheng University, Liaocheng, Shandong, 252059, China)

\*Correspondence:

E-mail: [guoyunliu@126.com](mailto:guoyunliu@126.com) (Guoyun Liu); [liurenmin@lcu.edu.cn](mailto:liurenmin@lcu.edu.cn) (Renmin Liu); [lilixu66@163.com](mailto:lilixu66@163.com) (Lili Xu)

#### **Preparation of Fe<sub>3</sub>O<sub>4</sub> nanoparticles**

Firstly, 75 mL of ethylene glycol solution containing 2.0 g of FeCl<sub>3</sub>·6H<sub>2</sub>O and 3.6 g of NaAC was stirred for 1.5 h, then transferred to a high pressure reactor, and reacted for 16 h at 200 °C. Finally, the obtained black powder was cooled and collected.

#### **Preparation of Na<sub>2</sub>BDC**

2.0 g of BDC and 1.0 g of NaOH were dispersed into 20 mL deionized water under stirring. The mixture was allowed to react 1 h at room temperature to obtain a transparent solution. When the reaction was finished, the mixture was subsequently precipitated in 300 mL cold isopropanol. The precipitation was washed with isopropanol to reach pH = 7 and dried in an oven at 75 °C.

#### **Characterizations of supports**

Fourier transform infrared spectra (FTIR) were conducted on a Nicolet 670 spectrometer (Thermo, USA) at a frequency range of 400-4000  $\text{cm}^{-1}$ . The X-ray diffraction spectra (XRD) was performed on a Bruker D8-Advance diffractometer (Germany) under the scanning rate of 4-8 $^{\circ}$ min $^{-1}$ . The magnetic properties of supports were determined using a vibrating sample magnetometer (VSM, Quantum Design, USA) at room temperature (RT) at a magnetic field range of 30 to -30 KOe. The WCA values were determined using the sessile drop mode. Transmission electron microscopy (TEM) was performed using a Tecnai G2 F20 (FEI, USA). Circular dichroism (CD) (190–260 nm) was performed using a JASCO J1500 (Japan) spectrometer at RT. Scanning electron microscopy (SEM) and energy dispersive spectrometry (EDS) were conducted using a Hitachi S4800 (Japan).
